# Supplementary material
Source: publisher figshare collection journal article supplement (https://gsajournals.figshare.com/ndownloader/files/24189398)

**Title:** Differential gene expression between polymorphic zooids of the marine bryozoan *Bugulina stolonifera*

**Authors:** Kira A. Treibergs and Gonzalo Giribet

## SUPPLEMENTAL INFORMATION

**Table S1:** Sample preparation dates for RNA-sequencing of *Bugulina stolonifera* tissue-specific samples (three biological replicates each) and one sample of *Rhodomonas salina*.

| Sample                   | Cultured  | Fixed     | Dissected | Extracted | cDNA    | PCR Amp. | qPCR    | Sequencing |
|--------------------------|-----------|-----------|-----------|-----------|---------|----------|---------|------------|
| Autozoid, Mature 1       | 7/1/2015  | 8/17/2015 | 4/1/2016  | 4/1/16    | 4/1/16  | 4/5/2016 | 4/25/17 | 5/4/17     |
| Autozoid, Mature 2       | 7/1/2015  | 8/17/2015 | 2/9/2016  | 2/9/2016  | 3/11/16 | 4/5/2016 | 4/25/17 | 5/4/17     |
| Autozoid, Mature 3       | 7/1/2015  | 8/17/2015 | 3/9/16    | 3/9/16    | 3/11/16 | 4/5/2016 | 4/25/17 | 5/4/17     |
| Autozoid, Bud 1          | 7/1/2015  | 8/17/2015 | 4/1/16    | 4/1/16    | 3/11/16 | 4/5/2016 | 4/25/17 | 5/4/17     |
| Autozoid, Bud 2          | 6/17/2016 | 8/16/2016 | 3/24/17   | 3/24/17   | 3/25/17 | 3/26/17  | 4/25/17 | 5/4/17     |
| Autozoid, Bud 3          | 7/1/2015  | 8/17/2015 | 3/9/16    | 3/9/16    | 3/11/16 | 4/5/2016 | 4/25/17 | 5/4/17     |
| Avicularium, Mature 1    | 6/17/2016 | 8/14/16   | 8/15/16   | 2/17/17   | 3/11/17 | 3/11/17  | 4/25/17 | 5/4/17     |
| Avicularium, Mature 2    | 6/17/2016 | 8/14/16   | 8/15/16   | 2/17/17   | 3/11/17 | 3/11/17  | 4/25/17 | 5/4/17     |
| Avicularium, Mature 3    | 6/17/2016 | 8/14/16   | 8/16/16   | 2/17/17   | 3/11/17 | 3/11/17  | 4/25/17 | 5/4/17     |
| Avicularium, Bud 1       | 6/17/2016 | 8/14/16   | 8/15/16   | 2/17/17   | 3/11/17 | 3/11/17  | 4/25/17 | 5/4/17     |
| Avicularium, Bud 2       | 6/17/2016 | 8/14/16   | 8/16/16   | 2/17/17   | 3/11/17 | 3/11/17  | 4/25/17 | 5/4/17     |
| Avicularium, Bud 3       | 6/17/2016 | 8/14/16   | 8/16/16   | 2/17/17   | 3/11/17 | 3/11/17  | 4/25/17 | 5/4/17     |
| Rhizoid, Network 1       | 7/1/2015  | 8/17/2015 | 4/1/16    | 4/1/16    | 4/1/16  | 4/5/2016 | 4/25/17 | 5/4/17     |
| Rhizoid, Network 2       | 6/17/2016 | 8/14/16   | 3/24/17   | 3/24/17   | 3/25/17 | 3/26/17  | 4/25/17 | 5/4/17     |
| Rhizoid, Network 3       | 6/17/2016 | 8/14/16   | 3/24/17   | 3/24/17   | 3/25/17 | 3/26/17  | 4/25/17 | 5/4/17     |
| Rhizoid, Autozoid 1      | 7/1/2015  | 8/17/2015 | 4/1/16    | 4/1/16    | 4/1/16  | 4/5/2016 | 5/25/16 | 5/27/16    |
| Rhizoid, Autozoid 2      | 6/17/2016 | 8/14/16   | 3/24/17   | 3/24/17   | 3/25/17 | 3/26/17  | 4/25/17 | 5/4/17     |
| Rhizoid, Autozoid 3      | 6/17/2016 | 8/14/16   | 3/24/17   | 3/24/17   | 3/25/17 | 3/26/17  | 4/25/17 | 5/4/17     |
| <i>Rhodomonas salina</i> | 6/11/2016 | 8/8/16    | 8/8/16    | 8/8/16    | 8/12/16 | 8/13/16  | 8/28/16 | 8/29/16    |

11 **Table S2: Trinity transcriptome assembly metrics for *Rhodomonas salina*.**

| <i>Stats based on all transcriptome contigs:</i> |                    |           | <i>Stats based on longest isoform per gene:</i> |                       |                        |                    |
|--------------------------------------------------|--------------------|-----------|-------------------------------------------------|-----------------------|------------------------|--------------------|
| Genes<br>(#)                                     | Transcripts<br>(#) | GC<br>(%) | Contig N50<br>(bp)                              | Median Contig<br>(bp) | Average Contig<br>(bp) | Total Bases<br>(#) |
| 57,502                                           | 64,951             | 53.19     | 416                                             | 286                   | 404.69                 | 26,285,090         |

32 **Table S3. Annotation of differentially expressed genes up-regulated in autozoid**  
33 **and avicularium tissue** (4-fold expression, FDR  $p < 0.001$ ). Annotated transcripts of  
34 selected differentially expressed genes from the 'Autozoid and Avicularium'  
35 transcriptome, with annotations are listed for several functional categories including  
36 WNT and Notch signaling pathways, heat response, nervous system and muscular  
37 system.

|                           | Zooid Type<br>Up-regulated | Transcript ID | log Fold<br>Change | PValue   | False<br>Discovery<br>Rate | Uniprot ID  | Protein Name                                           | Gene Name      |
|---------------------------|----------------------------|---------------|--------------------|----------|----------------------------|-------------|--------------------------------------------------------|----------------|
| ▼ WNT signaling pathway   |                            |               |                    |          |                            |             |                                                        |                |
|                           | Autozooid                  | 138519_c0_g1  | 11.65              | 6.26E-12 | 6.25E-08                   | RN213_HUMAN | E3 ubiquitin-protein ligase                            | <i>RNF213</i>  |
|                           | Autozooid                  | 104535_c1_g10 | 9.21               | 4.83E-08 | 2.32E-05                   | NPHP3_XENTR | Nephrocystin-3                                         | <i>nphp3</i>   |
|                           | Autozooid                  | 97261_c0_g3   | 8.99               | 2.63E-07 | 7.78E-05                   | RN213_MOUSE | E3 ubiquitin-protein ligase                            | <i>RNF213</i>  |
|                           | Avicularium                | 144339_c0_g1  | 7.64               | 1.4E-06  | 0.00024827                 | GBLP_RAT    | Receptor of activated pr otein C kinase 1              | <i>Rack1</i>   |
| ▼ Notch signaling pathway |                            |               |                    |          |                            |             |                                                        |                |
|                           | Autozooid                  | 95770_c0_g2   | 5.99               | 4.6E-06  | 0.000578                   | DTX3_PONAB  | Probable E3 ubiquitin-protein ligase                   | <i>DTX3</i>    |
|                           | Avicularium                | 104168_c1_g1  | 4.35               | 9.21E-10 | 1.59E-06                   | NOTC1_XENTR | Neurogenic locus notch homolog pr otein 1              | <i>notch1</i>  |
| ▼ Heat Response           |                            |               |                    |          |                            |             |                                                        |                |
|                           | Avicularium                | 55059_c0_g2   | 9.76               | 5.01E-09 | 4.63E-06                   | HS902_ARATH | Heat Shock Protein 90-2                                | <i>HSP90-2</i> |
|                           | Avicularium                | 190626_c0_g1  | 8.64               | 5.03E-06 | 0.000602                   | KCRM_CHICK  | Creatine kinase M-type                                 | <i>CKM</i>     |
|                           | Autozooid                  | 102041_c0_g5  | 7.92               | 4.05E-10 | 1.02E-06                   | HSP70_MAIZE | Heat Shock 70 Protein                                  | <i>HSP70</i>   |
|                           | Avicularium                | 102041_c0_g4  | 6.50               | 3.74E-06 | 0.000497                   | MD37C_ARATH | Heat Shock 70 kDa Protein 4                            | <i>HSP70-4</i> |
| ▼ Nervous System          |                            |               |                    |          |                            |             |                                                        |                |
|                           | Autozooid                  | 9660_c0_g1    | 11.62              | 8.08E-10 | 1.51E-06                   | RL10_DROME  | 60X ribosomal protein L10                              | <i>RpL10</i>   |
|                           | Autozooid                  | 104015_c0_g1  | 8.11               | 1.1E-06  | 0.000209                   | CFI1_CAEEL  | AT-rich interactive domain-containing pr otein cfi-1   | <i>cfi-1</i>   |
|                           | Autozooid                  | 107873_c0_g4  | 7.73               | 9.58E-09 | 7.51E-06                   | FBX38_HUMAN | F-box only protein 38                                  | <i>FBXO39</i>  |
|                           | Autozooid                  | 106834_c0_g1  | 6.18               | 6.65E-06 | 0.000721                   | IF4G1_MOUSE | Eukaryotic translation initiation factor 4 gamma 1     | <i>Elf4g1</i>  |
|                           | Autozooid                  | 109181_c0_g1  | 6.00               | 1.91E-08 | 1.18E-05                   | CPEB1_HUMAN | Cytoplasmic polyadenylation element-binding pr otein 1 | <i>CPEB1</i>   |
|                           | Autozooid                  | 107498_c0_g1  | 5.54               | 6.06E-09 | 5.32E-06                   | MATN2_MOUSE | Matrilin-2                                             | <i>Matn2</i>   |
|                           | Autozooid                  | 101264_c0_g2  | 4.46               | 3.15E-07 | 9.03E-05                   | CEL_RAT     | Bile salt-activated lipase                             | <i>Cel</i>     |
|                           | Avicularium                | 147413_c0_g1  | 9.29               | 4.34E-06 | 0.000558                   | APOD_BOVIN  | Apolipoprotein D                                       | <i>APOD</i>    |
|                           | Avicularium                | 82063_c0_g1   | 9.26               | 1.45E-08 | 9.89E-06                   | APOD_RAT    | Apolipoprotein D                                       | <i>APOD</i>    |
|                           | Avicularium                | 136775_c0_g1  | 8.65               | 4.59E-06 | 0.000578                   | IF4E_DROME  | Eukaryotic translation initiation factor               | <i>elf4E1</i>  |
|                           | Avicularium                | 193557_c0_g1  | 8.43               | 3.25E-06 | 0.000447                   | TEN3_DANRE  | Teneurin-3                                             | <i>tenm3</i>   |
|                           | Avicularium                | 165368_c0_g1  | 7.48               | 2.65E-07 | 7.83E-05                   | TENA_MOUSE  | Tenascin                                               | <i>Tnc</i>     |
|                           | Avicularium                | 71212_c0_g1   | 6.90               | 4.57E-06 | 0.000577                   | TENA_MOUSE  | Tenascin                                               | <i>Tnc</i>     |
|                           | Avicularium                | 190643_c0_g1  | 6.88               | 3.99E-06 | 0.000522                   | TEN1_CHICK  | Teneurin-1                                             | <i>TENM1</i>   |
| ▼ Muscular System         |                            |               |                    |          |                            |             |                                                        |                |
|                           | Autozooid                  | 104015_c0_g1  | 8.11               | 1.1E-06  | 0.000209                   | DRI_DROME   | Protein dead ringer                                    | <i>retn</i>    |
|                           | Autozooid                  | 109395_c1_g3  | 7.36               | 1.33E-06 | 0.000242                   | RHOAA_DANRE | Rho-related GTP-binding protein RhoA-A                 | <i>rhoaa</i>   |
|                           | Autozooid                  | 88683_c0_g1   | 6.08               | 6.59E-07 | 0.000151                   | M10L1_MOUSE | RNA helicase Mov10l1                                   | <i>Mov10l1</i> |
|                           | Avicularium                | 147413_c0_g1  | 9.29               | 4.34E-06 | 0.00055831                 | APOD_BOVIN  | ApolipoproteinD                                        | <i>APOD</i>    |
|                           | Avicularium                | 82063_c0_g1   | 9.26               | 1.45E-08 | 9.89E-06                   | BLC_ECOLI   | Outer membrane lipoprotein Blc                         | <i>blc</i>     |
|                           | Avicularium                | 136775_c0_g1  | 8.65               | 4.59E-06 | 0.000578                   | IF4E_DROME  | Eukaryotic translation initiation factor 4E1           | <i>elf4E1</i>  |
|                           | Avicularium                | 162086_c0_g1  | 8.32               | 2.03E-06 | 0.000321                   | RAC1_DROME  | Res-related protein Rac1                               | <i>Rac1</i>    |
|                           | Avicularium                | 85049_c0_g3   | 7.70               | 6.6E-06  | 0.000718                   | TCAF_XENLA  | TRPM8 channel-associated factor homolog                | <i>tcaf</i>    |
|                           | Avicularium                | 165368_c0_g1  | 7.48               | 2.65E-07 | 7.83E-05                   | TENA_MOUSE  | Tenascin                                               | <i>Tnc</i>     |
|                           | Avicularium                | 71212_c0_g1   | 6.90               | 4.57E-06 | 0.000577                   | TENA_MOUSE  | Tenascin                                               | <i>Tnc</i>     |
|                           | Avicularium                | 115838_c0_g1  | 6.71               | 4.5E-06  | 0.000572                   | TITN_MOUSE  | Titin                                                  | <i>Ttn</i>     |
|                           | Avicularium                | 112663_c0_g1  | 4.53               | 3.34E-08 | 1.76E-05                   | CO4A1_CAEEL | Collagen alpha-1(IV) chain                             | <i>emb-9</i>   |
|                           | Avicularium                | 98082_c1_g1   | 4.22               | 4.27E-07 | 0.000114                   | UNC87_CAEEL | Protein unc-87                                         | <i>unc-87</i>  |
|                           | Avicularium                | 111938_c1_g4  | 4.13               | 1.77E-07 | 5.86E-05                   | UNC87_CAEEL | Protein unc-87                                         | <i>unc-87</i>  |
|                           | Avicularium                | 109962_c0_g1  | 4.03               | 1.29E-09 | 1.92E-06                   | STA5B_MOUSE | Signal transducer and activator of transcription 5b    | <i>Stat5b</i>  |

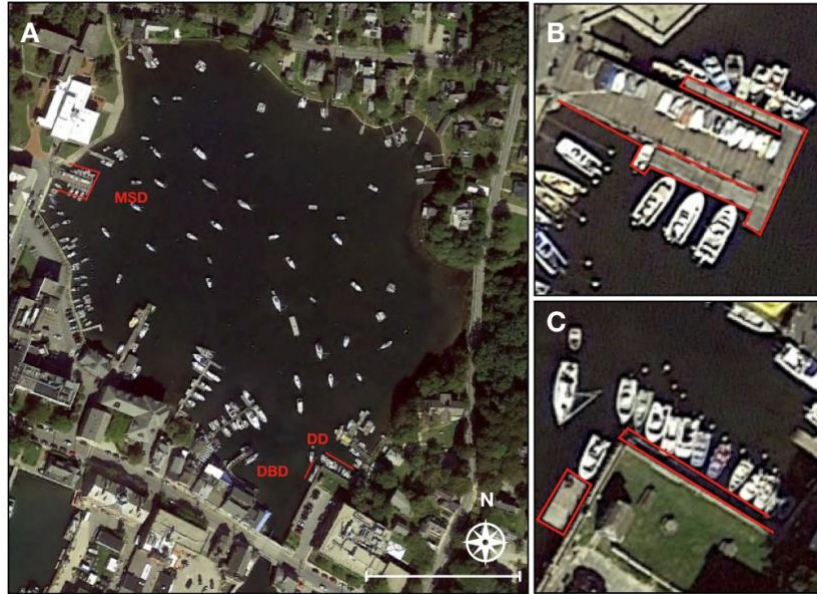

**Figure S1: Bryozoan collection sites.** A) Eel Pond, located at 41°31'32.40" N 70°40'13.25" W. Scale bar is 100 M. DBD- Drawbridge Dock, DD- Dinghy Dock, and MSD- MBL St. Dock. B) MBL St. Dock, zoomed in to show collection transects. C) Drawbridge Dock (to west) and Dinghy Dock (to east) collection transects. Adapted from Google Earth.

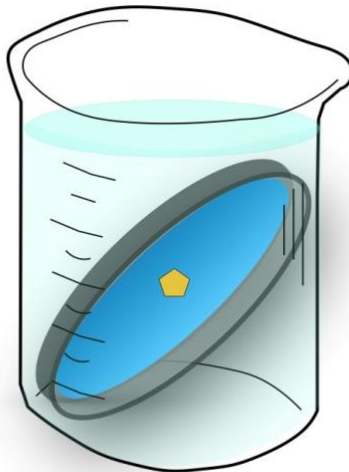

47 **Figure S2: Bryozoan culture.** Each individual (yellow), metamorphosed onto a 45  
 48 mm acetate disc (blue), was seated into a 45mm diameter petri dish (grey). Dishes  
 49 were oriented vertically in 150 mL beakers, such that ancestrulae were oriented  
 50 downwards, and beakers were filled with 125 mL Eel Pond Seawater (EPSW). 30  
 51 mm glass dishes were wedged over the petri dishes to keep them submerged and  
 52 suspended in place (not depicted).

53

54

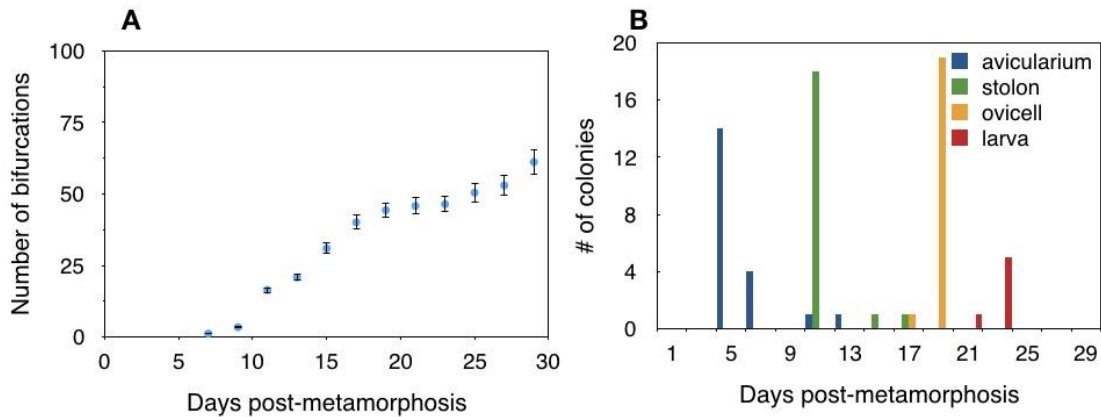

55

56 **Figure S3: Bryozoan colony growth.** *B. stolonifera* colonies were cultured in the  
 57 lab for one month, from metamorphosis on July 2, 2015. **A)** Colony growth  
 58 (measured as number of bifurcations) is plotted over time. Error bars indicate  
 59 Standard Error. **B)** Each colony was monitored every other day for the first  
 60 appearance of polymorphic zooids (avicularia, stolons, ooecia) and larvae. The  
 61 days post-metamorphosis of the first appearance of these polymorphic zooids is  
 62 plotted over the course of one month of culturing. (n = 23 colonies)

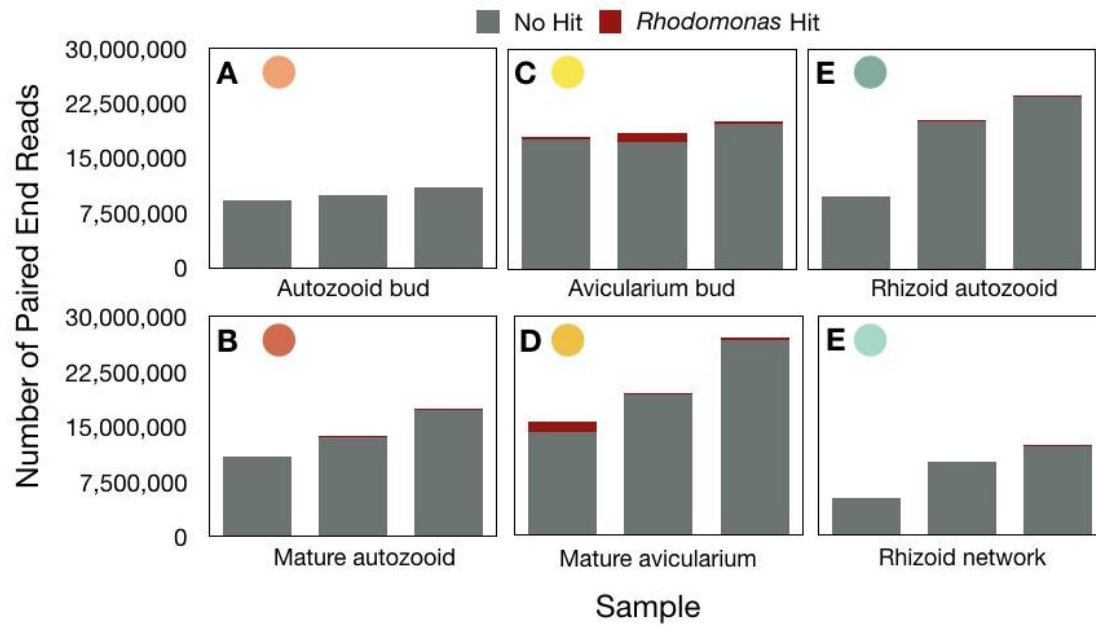

**Figure S4: Removal of *R. salina* contamination** All bryozoan paired reads were mapped to a transcriptome of the cryptophyte using Bowtie2. In cases where one or both pairs mapped to the *R. salina* transcriptome, those reads were removed from the dataset.

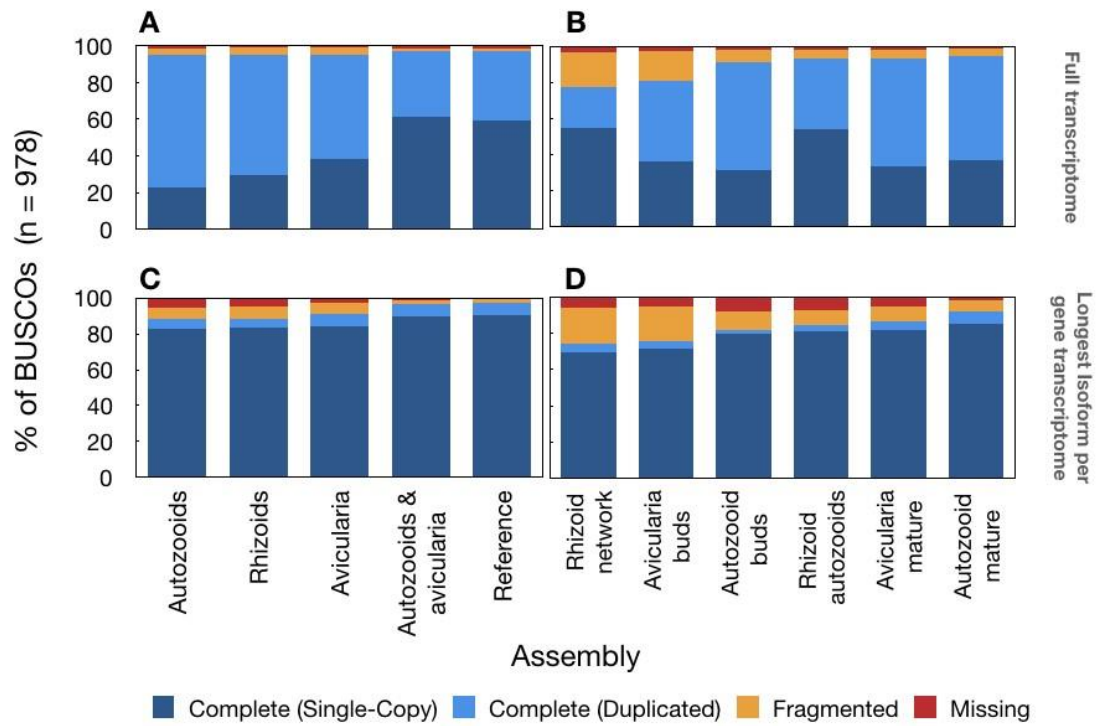

**Figure S5: BUSCO analysis of assembly completeness** for A, C) tissue-specific and B,D) sample-specific assemblies of *B. stolonifera*, comparing BUSCO results for the complete transcriptome dataset (all isoforms included) A, B) with BUSCO results for a dataset composed of the longest isoform per gene C, D). Transcriptomes were searched using the *metazoa odb9* database which contains a total of 978 curated single-copy gene orthologs.



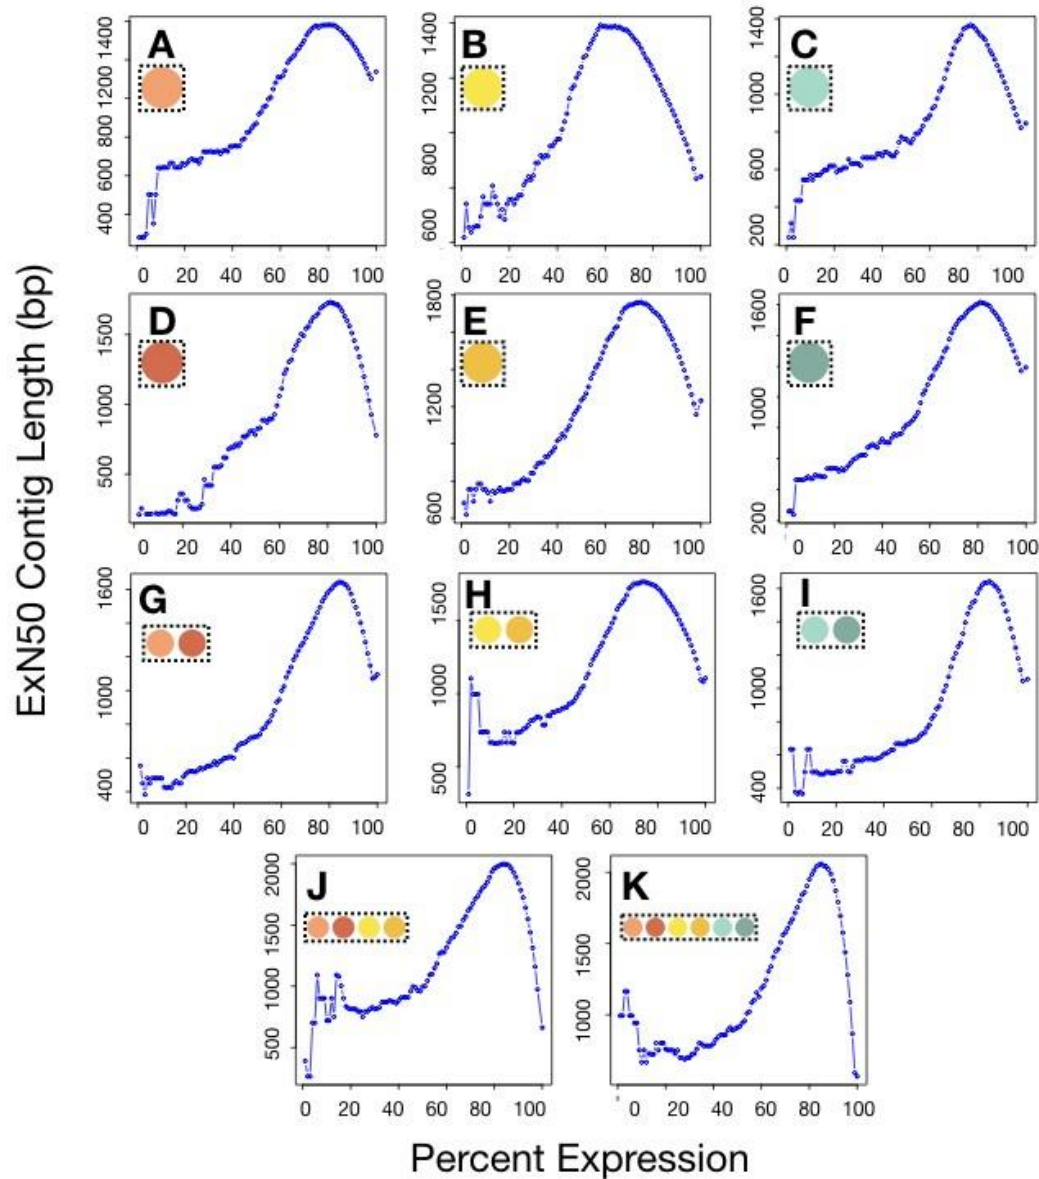

**Figure S6: ExN50 Plots.** Contig N50 (the size of contigs where half of the assembled bases are found) is plotted by percent (normalized) gene expression for each transcriptome assembly. **A)** Autozoid bud assembly, **B)** Avicularium bud assembly, **C)** Rhizoid network assembly, **D)** Mature autozoid assembly, **E)** Mature avicularium assembly, **F)** Rhizoid autozoid assembly, **G)** Autozoid assembly, **H)** Avicularium assembly, **I)** Rhizoid assembly, **J)** Autozooids and avicularia assembly, and **K)** Reference assembly.

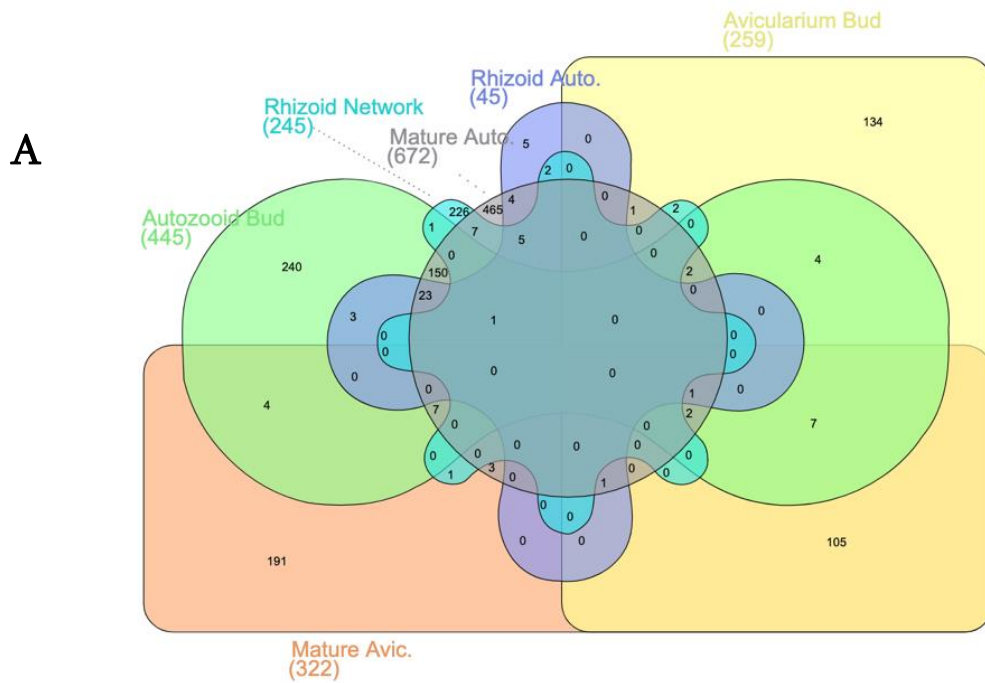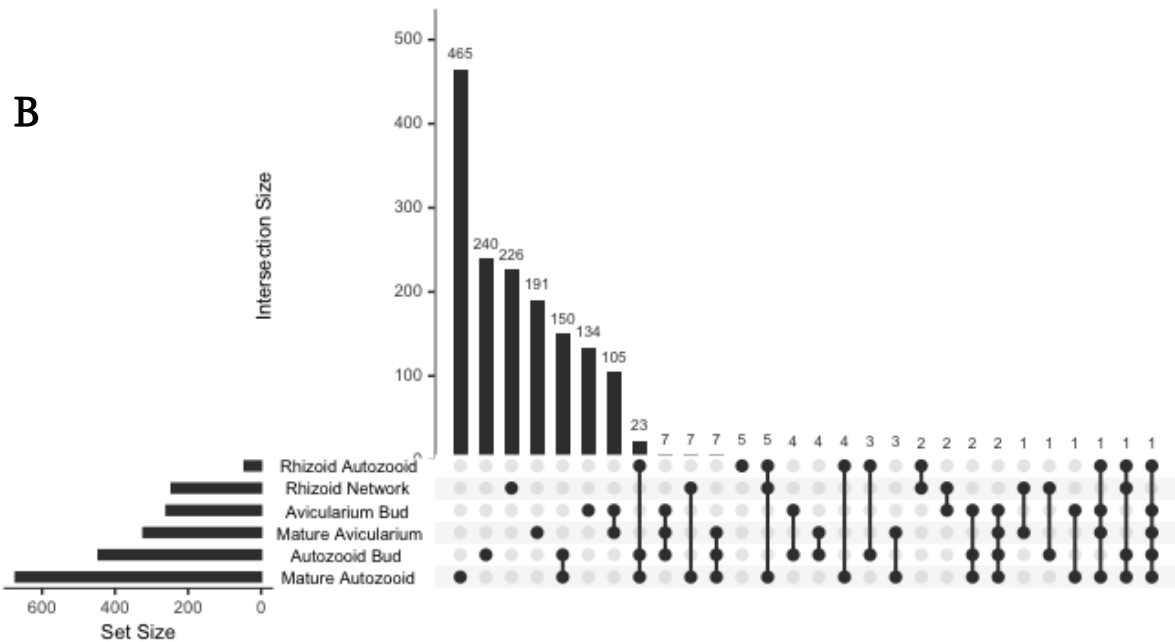

**Figure S7: Shared and significantly up-regulated gene transcripts of each zooid type.** Average expression (at 4-fold or greater level, FDR  $p < 0.001$ ) was calculated across sample replicates from pairwise comparisons in the reference transcriptome and summarized as sample-specific up-regulated gene expression

95 for each zooid type. The set of 1,597 differentially differently expressed genes  
96 are depicted as a **A**) six-way Venn diagram (Heberle *et al.*, 2015), with shared  
97 genes between tissue types depicted as areas of overlap and the count of unique  
98 genes for each tissue type depicted as areas without overlap, and as an **B**) UpSet  
99 plot (Conway *et al.*, 2017) where unique differentially expressed gene counts are  
100 depicted for each unique tissue type as well as for subsets of multiple tissue types.  
101 Sample abbreviations are as follows: “Mature Auto.” = Mature autozooid, “Mature  
102 avic.” = Mature avicularium, “Rhizoid auto.” = Rhizoid autozooid.  
103

104  
105

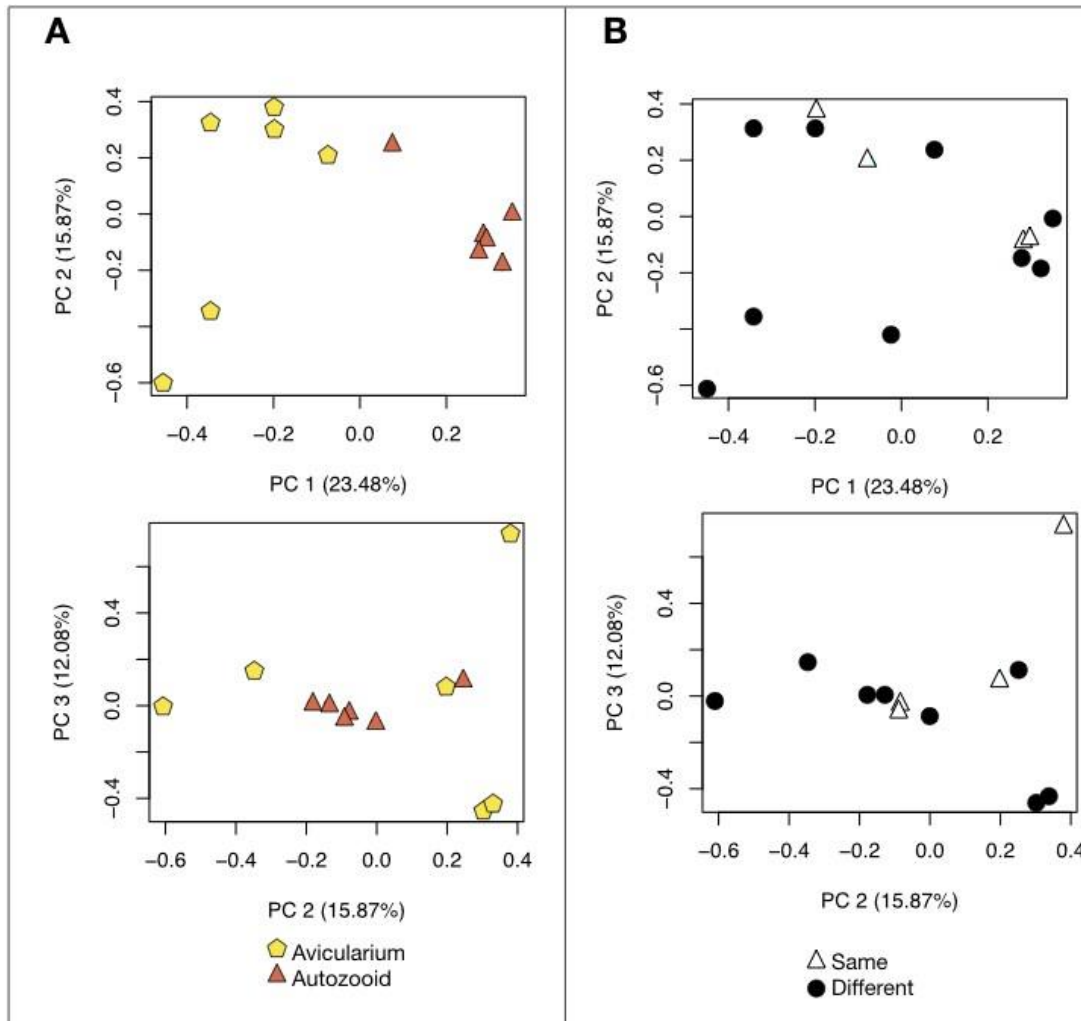

106

107 **Figure S8: Autozoid and avicularium transcriptome sample relationships.**  
 108 Principal components analysis (plotted as PC1 vs. PC2 and PC2 vs. PC3) of the  
 109 log<sub>2</sub> gene count matrix demonstrates the relative similarity of transcripts in each  
 110 sample in the autozoid and avicularium transcriptome assembly. **A)** Samples are  
 111 labeled by tissue type and developmental stage ('auto' = mature autozoid and  
 112 autozoid bud samples, 'avic' = avicularium bud and mature avicularium  
 113 samples). **B)** Samples are labeled by genetic individual, where samples labeled  
 114 'diff.' originate from genetically distinct colonies and samples labeled 'same'

represent six tissue samples of different zooid type and stage, that originated from the same genetic individual.

117  
118  
119

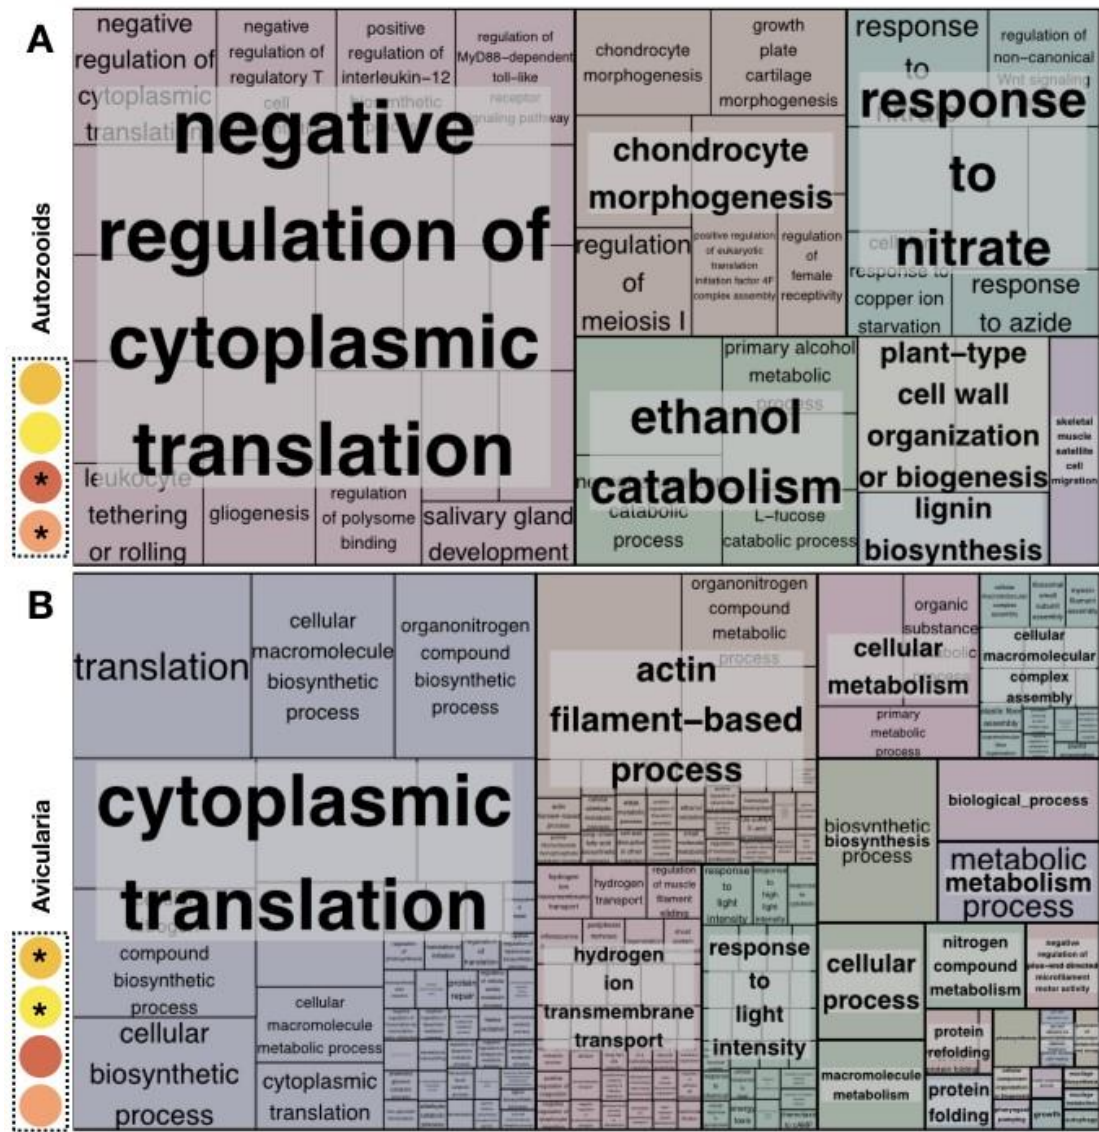

120

121 **Figure S9: Autozoooid and avicularium transcriptome gene ontology, biological**  
122 **processes. A) enriched GO terms found in genes that are up-regulated in**





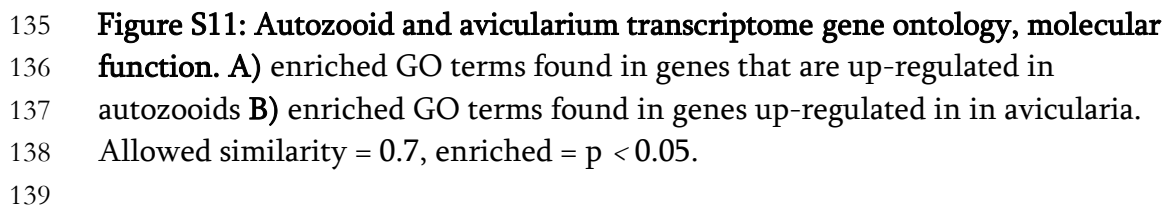

Supplement: Supplementary file 1 [file 24189398]
